# Supplementary material for: Italian Response to Coronavirus Pandemic in Dental Care Access: The DeCADE Study
Source: PubMed Central journal article supplement (PMC7579054; doi:10.3390/ijerph17196977), 2020-09-24
Supplement: ijerph-17-06977-s001.pdf [file ijerph-17-06977-s001.pdf]

**Table S1.** Questionnaire used in order to analyze the Italian patient's anxiety, concerns or willingness to undergo dental care treatments after SARS-CoV-2. This is the English version of the original questionnaire in Italian language.

| Questions                                                           | Modalities                                 |
|---------------------------------------------------------------------|--------------------------------------------|
| 1. Select your age group                                            | 18-24                                      |
|                                                                     | 25-34                                      |
|                                                                     | 35-44                                      |
|                                                                     | 45-54                                      |
|                                                                     | 55-64                                      |
|                                                                     | 65-74                                      |
|                                                                     | Over 75                                    |
| 2. Gender                                                           | Female                                     |
|                                                                     | Male                                       |
| 3. Region of Residency                                              | Open Answer                                |
| 4. Marital Status                                                   | Unmarried                                  |
|                                                                     | Married                                    |
|                                                                     | Separated                                  |
|                                                                     | Divorced                                   |
|                                                                     | Widowed                                    |
| 5. Including yourself, how many people are in your household?       | 1                                          |
|                                                                     | 2                                          |
|                                                                     | 3                                          |
|                                                                     | 4                                          |
|                                                                     | 4+                                         |
| 6. What is your educational level?                                  | Primary School                             |
|                                                                     | Middle School                              |
|                                                                     | High School                                |
|                                                                     | Bachelor's degree                          |
|                                                                     | Master's degree                            |
|                                                                     | PhD/Specialization School                  |
| 7. What is your current employment status?                          | Employed in a public company               |
|                                                                     | Employed in a private company              |
|                                                                     | Self Employed/Freelance                    |
|                                                                     | Entrepreneur                               |
|                                                                     | Housekeeper                                |
|                                                                     | Unemployed                                 |
|                                                                     | Student                                    |
| Retired                                                             |                                            |
| 8. Did coronavirus pandemic reduce the income of your household?    | No, income remained unchanged.             |
|                                                                     | Yes, income was reduced up to 20%          |
|                                                                     | Yes, income was reduced between 20 and 50% |
|                                                                     | Yes, income was reduced over 50%           |
|                                                                     | Yes, household income reduced to zero      |
| 9. How much do you fear being infected by SARS-CoV-2?               | Not at all                                 |
|                                                                     | A Little                                   |
|                                                                     | Quite                                      |
|                                                                     | A Lot                                      |
|                                                                     | Extremely                                  |
| 10. How much do you fear SARS-CoV-2 could infect your dearest ones? | Not at all                                 |
|                                                                     | A Little                                   |
|                                                                     | Quite                                      |
|                                                                     | A Lot                                      |

|                                                                                                                                                             |                                                                                         |
|-------------------------------------------------------------------------------------------------------------------------------------------------------------|-----------------------------------------------------------------------------------------|
|                                                                                                                                                             | Extremely                                                                               |
|                                                                                                                                                             | Not at all                                                                              |
| 11. How much do you feel comfortable when you go out from your home?                                                                                        | A Little                                                                                |
|                                                                                                                                                             | Quite                                                                                   |
|                                                                                                                                                             | A Lot                                                                                   |
|                                                                                                                                                             | Extremely                                                                               |
| 12. With respect to the modalities of contagion from coronavirus...                                                                                         | I feel anxious                                                                          |
|                                                                                                                                                             | I feel quiet, it is enough to respect the safety measures                               |
|                                                                                                                                                             | I think the virus has lost its effect, it is less aggressive and contagious than before |
| 13. How much do you think that fear of being infected might generate or has generated collective hysteria?                                                  | Not at all                                                                              |
|                                                                                                                                                             | A Little                                                                                |
|                                                                                                                                                             | Quite                                                                                   |
|                                                                                                                                                             | A Lot                                                                                   |
|                                                                                                                                                             | Extremely                                                                               |
| 14. Further than information received from TVs and newspapers, did you look for more information on Covid-19?                                               | Yes                                                                                     |
|                                                                                                                                                             | No                                                                                      |
| 15. Through which channels did you get informed on Covid-19? You can select more than one option.                                                           | Newspapers/Online newspapers                                                            |
|                                                                                                                                                             | TV/Radio                                                                                |
|                                                                                                                                                             | Social Media (Facebook, Instagram, YouTube...)                                          |
|                                                                                                                                                             | Blog/Forum                                                                              |
|                                                                                                                                                             | Journals or Websites of Medicine, Health, Wellness                                      |
|                                                                                                                                                             | Family Doctor/Other Doctors/Chemist                                                     |
|                                                                                                                                                             | Other                                                                                   |
| 16. How much do you think these channels are reliable to get information on Covid-19? Assign a value from 1 to 5, where 1 is not at all and 5 is Extremely. | 1    2    3    4    5                                                                   |
|                                                                                                                                                             | Newspapers/Online newspapers                                                            |
|                                                                                                                                                             | TV/Radio                                                                                |
|                                                                                                                                                             | Social Media (Facebook, Instagram, YouTube...)                                          |
|                                                                                                                                                             | Blog/Forum                                                                              |
|                                                                                                                                                             | Journals or Websites of Medicine, Health, Wellness                                      |
|                                                                                                                                                             | Family Doctor/Other Doctors/Chemist                                                     |
|                                                                                                                                                             | Friends and Relatives                                                                   |
| 17. How much do you think you are informed about the modalities of contagion from SARS-CoV-2?                                                               | Not at all                                                                              |
|                                                                                                                                                             | A Little                                                                                |
|                                                                                                                                                             | Quite                                                                                   |
|                                                                                                                                                             | A Lot                                                                                   |
|                                                                                                                                                             | Extremely                                                                               |
| 18. How much do you fear a new diffusion of coronavirus after the reopening of activities?                                                                  | Not at all                                                                              |
|                                                                                                                                                             | A Little                                                                                |
|                                                                                                                                                             | Quite                                                                                   |
|                                                                                                                                                             | A Lot                                                                                   |
|                                                                                                                                                             | Extremely                                                                               |
| 19. How much do you think the measures adopted to limit contagion are effective?                                                                            | Not at all                                                                              |
|                                                                                                                                                             | A Little                                                                                |
|                                                                                                                                                             | Quite                                                                                   |
|                                                                                                                                                             | A Lot                                                                                   |
|                                                                                                                                                             | Extremely                                                                               |
|                                                                                                                                                             | At least 1 meter                                                                        |

|                                                                                                                    |                                                                                                                            |
|--------------------------------------------------------------------------------------------------------------------|----------------------------------------------------------------------------------------------------------------------------|
| 20. What is the safety distance between two people who are NOT wearing a face mask?                                | 2 meters                                                                                                                   |
|                                                                                                                    | More than 2 meters                                                                                                         |
| 21. What is the safety distance between two people who are both wearing a face mask?                               | At least 1 meter                                                                                                           |
|                                                                                                                    | 2 meters                                                                                                                   |
|                                                                                                                    | More than 2 meters                                                                                                         |
|                                                                                                                    | The safety distance is not needed                                                                                          |
|                                                                                                                    | Yes                                                                                                                        |
|                                                                                                                    | No                                                                                                                         |
| 22. If two persons are physically close and just one of them is wearing a face mask, is there a risk of infection? | It depends on the kind of face mask, some of them protect from contagion and at the same time don't allow to infect others |
|                                                                                                                    | I don't know                                                                                                               |
| 23. During Phase 2, do you think you will resume the activities you left behind at the beginning of the emergency? | As before the crisis, with no fear                                                                                         |
|                                                                                                                    | As before the crisis, with fear                                                                                            |
|                                                                                                                    | Less than before, with no fear                                                                                             |
|                                                                                                                    | Less than before and with fear                                                                                             |
|                                                                                                                    | With fear                                                                                                                  |
|                                                                                                                    | I won't resume                                                                                                             |
| 24. What is the main reason for your visits at the dentist?                                                        | I only go for emergencies                                                                                                  |
|                                                                                                                    | I go for control visits or regular oral hygiene appointments                                                               |
|                                                                                                                    | I am following a treatment plan                                                                                            |
|                                                                                                                    | I don't go / I've never been to a dentist → if so, you can skip directly to question 30                                    |
| 25. Do you have a trusted dentist?                                                                                 | Yes                                                                                                                        |
|                                                                                                                    | No                                                                                                                         |
| 26. Which kind of dentist clinic are you used to go to?                                                            | Private                                                                                                                    |
|                                                                                                                    | Public                                                                                                                     |
|                                                                                                                    | Low Cost Chain                                                                                                             |
|                                                                                                                    | Affiliated Private Clinic                                                                                                  |
| 27. Where is the clinic you go to?                                                                                 | In the same Province and city I live in                                                                                    |
|                                                                                                                    | In the same Province I live in, but in a different city                                                                    |
|                                                                                                                    | In a different Province but in the same Region I live in                                                                   |
|                                                                                                                    | In a different Region from the one I live in                                                                               |
|                                                                                                                    | Abroad                                                                                                                     |
| 28. Since how many years do you visit the same dentist?                                                            | Less than 1 year                                                                                                           |
|                                                                                                                    | 2-3 years                                                                                                                  |
|                                                                                                                    | More than 3 years                                                                                                          |
|                                                                                                                    | In case of necessity                                                                                                       |
| 29. How often do you go to the dentist?                                                                            | At least once a year                                                                                                       |
|                                                                                                                    | A couple of times a year                                                                                                   |
|                                                                                                                    | Three times or more per year                                                                                               |
| 30. From March 9 <sup>th</sup> to May 4 <sup>th</sup> , 2020, did you need to undergo oral care?                   | Yes                                                                                                                        |
|                                                                                                                    | No → if so, you can skip directly to question 34                                                                           |
| 31. What was your behavior?                                                                                        | I underwent without any problem                                                                                            |
|                                                                                                                    | I underwent with fear                                                                                                      |
|                                                                                                                    | I postponed them to a date to be determined                                                                                |
|                                                                                                                    | The problem was solved telematically                                                                                       |
|                                                                                                                    | The Clinic postponed or cancelled the appointment                                                                          |

|                                                                                                                   |                                                         |
|-------------------------------------------------------------------------------------------------------------------|---------------------------------------------------------|
|                                                                                                                   | The Dentist was wearing Personal Protective Equipment   |
|                                                                                                                   | I could smell the disinfectant                          |
| 32. How much did these measures make you feel safe? You can choose more than one option.                          | I was informed about the precautionary measures adopted |
|                                                                                                                   | I looked for information on various channels            |
|                                                                                                                   | I fully trust my dentist                                |
|                                                                                                                   | I was not feeling safe                                  |
|                                                                                                                   | Positively                                              |
| 33. Having undergone the oral care treatment, how do you evaluate the experience?                                 | Negatively                                              |
|                                                                                                                   | I do not know                                           |
|                                                                                                                   | Other                                                   |
| 34. Do you have any scheduled appointment in the next months?                                                     | Yes                                                     |
|                                                                                                                   | No                                                      |
|                                                                                                                   | I would undergo oral care without any problem           |
| 35. How will or would you behave if you have scheduled appointments at the dentist?                               | I would undergo oral care with fear                     |
|                                                                                                                   | I would postpone the appointment                        |
|                                                                                                                   | I would cancel the appointment                          |
|                                                                                                                   | Fear of contagion                                       |
| 36. What do you think might be the main reason to cancel a scheduled oral care appointment?                       | Non urgent cures                                        |
|                                                                                                                   | Lowered income                                          |
|                                                                                                                   | I'd rather the number of new cases to decrease more     |
|                                                                                                                   | Other                                                   |
|                                                                                                                   | Not at all                                              |
| 37. During Phase 2, how comfortable would you feel in starting/going on with oral care?                           | A Little                                                |
|                                                                                                                   | Quite                                                   |
|                                                                                                                   | A Lot                                                   |
|                                                                                                                   | Extremely                                               |
|                                                                                                                   | Not at all                                              |
| 38. During Phase 2, how much do you think the risk of contagion could affect your next appointments?              | A Little                                                |
|                                                                                                                   | Quite                                                   |
|                                                                                                                   | A Lot                                                   |
|                                                                                                                   | Extremely                                               |
|                                                                                                                   | Not at all                                              |
| 39. How urgent do you think it is urgent to resume with the cures you stopped?                                    | A Little                                                |
|                                                                                                                   | Quite                                                   |
|                                                                                                                   | A Lot                                                   |
|                                                                                                                   | Extremely                                               |
|                                                                                                                   | Not at all                                              |
| 40. How much do you trust your dentist for what concerns sterilization and sanitization of tools and environment? | A Little                                                |
|                                                                                                                   | Quite                                                   |
|                                                                                                                   | A Lot                                                   |
|                                                                                                                   | Extremely                                               |
| 41. Did your dentist give you all the information on the sanitization procedures adopted in the dental office?    | Yes                                                     |
|                                                                                                                   | No                                                      |
|                                                                                                                   | Phone Call                                              |
|                                                                                                                   | Talk                                                    |
| 42. Through which means of communication did you get the information? You can select more than one option.        | Message                                                 |
|                                                                                                                   | Email                                                   |
|                                                                                                                   | Social Network                                          |
|                                                                                                                   | I didn't receive any information                        |
|                                                                                                                   | Other                                                   |

43. Will you look for further information to feel safer with concern to access to oral care?

- No, I feel safe and I won't look for other information

---
  - Yes, I will directly call the Clinic or the dentist

---
  - Yes, I will browse the website of the Clinic

---
  - Yes, I will browse websites specialized in medicine

---
  - Yes, I will ask for information on social media

---
  - Yes, I will get informed through friends and family

---
  - Other

---
-

**Table S2.** Reclassification of variables used for the analysis.

| <b>New Variable</b>                                                             | <b>Answers</b>                                               | <b>Variable modality</b> |
|---------------------------------------------------------------------------------|--------------------------------------------------------------|--------------------------|
| "Educational level"<br>Question number 6 Table S1                               | Primary School                                               | Low/Medium               |
|                                                                                 | Middle School                                                | Low/Medium               |
|                                                                                 | High School                                                  | Low/Medium               |
|                                                                                 | Bachelor's Degree                                            | High                     |
|                                                                                 | Master's Degree                                              | High                     |
| "Income reduction"<br>Question number 8 Table S1                                | PhD/Specialization School                                    | High                     |
|                                                                                 | No, income remained unchanged.                               | < 50%                    |
|                                                                                 | Yes, income was reduced up to 20%                            | < 50%                    |
|                                                                                 | Yes, income was reduced between 20 and 50%                   | < 50%                    |
| "Contagion fear"<br>Question number 9 Table S1                                  | Yes, income was reduced over 50%                             | ≥ 50%                    |
|                                                                                 | Yes, household income reduced to zero                        | ≥ 50%                    |
| "Feeling comfortable when going out of home"<br>Question number 11 Table S1     | ≤ 3                                                          | No                       |
|                                                                                 | > 3                                                          | Yes                      |
| "Fear of new spread of SARS-CoV-2"<br>Question number 24 Table S1               | ≤ 3                                                          | No                       |
|                                                                                 | > 3                                                          | Yes                      |
|                                                                                 | I only go for emergencies                                    | Regular visit            |
|                                                                                 | I go for control visits or regular oral hygiene appointments | Regular visit            |
| "Dental attendance"<br>Question number 26 Table S1                              | I am following a treatment plan                              | Regular visit            |
|                                                                                 | I don't go / I've never been to a dentist                    | Urgent care              |
|                                                                                 | Private                                                      | Private                  |
|                                                                                 | Public                                                       | Public                   |
| "Phase 2 Dental visit behavior"<br>Question number 35 Table S1                  | Low Cost Chain                                               | Low cost                 |
|                                                                                 | Affiliated Private Clinic                                    | Public                   |
|                                                                                 | I would undergo oral care without any problem                | Attendance without fear  |
|                                                                                 | I would undergo oral care with fear                          | Attendance with fear     |
|                                                                                 | I would postpone the appointment                             | Postpone or cancel       |
| "Feeling comfortable to attend dental visit"<br>Question number 37 Table S1     | I would cancel the appointment                               | Postpone or cancel       |
|                                                                                 | ≤ 3                                                          | No                       |
| "Impact of contagion risk on dental visit"<br>Question number 38 Table S1       | > 3                                                          | Yes                      |
|                                                                                 | ≤ 3                                                          | No                       |
| "Trusting dentist on sanitization procedures"<br>Question number 40 Table S1    | > 3                                                          | Yes                      |
|                                                                                 | ≤ 3                                                          | No                       |
| "Dentist information on sanitization procedures"<br>Question number 41 Table S1 | > 3                                                          | Yes                      |
|                                                                                 | ≤ 3                                                          | No                       |
